# Supplementary material for: Genetic variation and structure of complete chloroplast genome in alien monoecious and dioecious Amaranthus weeds
Source: Research Square preprint supplement (doi:10.21203/rs.3.rs-509003/v1), 2021-05-17
Supplement: Supplementary file 1 [file cc3e521c7ea32b9649343748.xlsx]

## Sheet: Information
Genetic variation and structure of complete chloroplast genome in alien monoecious and dioecious Amaranthus weeds Han Xu, Ning Xiang, Junhua Zhang, Yongjiang Zhang* Institute of plant inspection and quarantine , Chinese Academy of Inspection and Quarantine, Beijing 100176, China *To whom correspondence should be addressed. E-mail: zhangyjpvi@yeah.net

## Sheet: Table S1
Table S1 Materials information of Amaranthus
Species		collection numbers
Amaranthus albus	Xinjiang	2372
Amaranthus arenicola	Jiangsu	JSTZ
Amaranthus arenicola	Hebei	HBTS
Amaranthus blitoides	Inner Mongolia	14
Amaranthus blitum	Beijing	2
Amaranthus capensis	Jiangsu	12182
Amaranthus crispus	Hebei	12128
Amaranthus deflexus	Spain	2011
Amaranthus dubius	Shandong	12274
Amaranthus hybridus	Zhejiang	7
Amaranthus palmeri	Beijing	1
Amaranthus polygonoides	Beijing	90006
Amaranthus retroflexus	Neimenggu	41
Amaranthus spinosus	Beijing	11902
Amaranthus spinosus	Beijing	113
Amaranthus standleyansus	Zhejing	7433
Amaranthus standleyansus	Beijing	11960
Amaranthus tunetanus	Jiangsu	12127
Amaranthus tuberculatus var. rudis	Jiangsu	12194
Amaranthus tuberculatus var. rudis	Guangdong	GZW
Amaranthus tuberculatus var. tuberculatus	Fujian	11994

## Sheet: Table S2
Table S2 Genes contained in the sequenced amaranths chloroplast genomes
Category		Gene group	Gene names
Protein-coding genes	Photosynthesis	Subunits of ATP synthase	atpA, atpB, atpE, atpFa, atpH, atpI
		Subunits of NADH-dehydrogenase	ndhAa, ndhBa (×2), ndhC, ndhD, ndhE, ndhF, ndhG, ndhH, ndhI, ndhJ, ndhK
		Subunits of cytochrome b/f complex	petA, petB, petD, petG, petL, petN
		Subunits of photosystem I	psaA, psaB, psaC, psaI, psaJ
		Subunits of photosystem II	psbA, psbB, psbC, psbD, psbE, psbF, psbH, psbI, psbJ, psbK, psbL, psbM, psbN, psbT, psbZ
		Subunit of RuBisCO	rbcL
	Other genes	Subunit of acetyl-CoA-carboxylase	accD
		c-type cytochrome synthesis gene	ccsA
		Envelope membrane protein	cemA
		Protease	clpPa
		Translational initiation factor	infA
		Maturase	matK
	Unknown function	Conserved open reading frames	ycf1 (×3), ycf2 (×2), ycf3, ycf4
	Self-replication	Large subunit of ribosome	rpl2 (×2), rpl14, rpl16b, rp20, rpl22, rpl32, rpl33, rpl36
		DNA-dependent RNA polymerase	rpoA, rpoB, rpoC1a, rpoC2
		Small subunit of ribosome	rps2, rps3, rps4, rps7 (×2), rsp8, rps11, rps12a (×3), rps14, rps15, rps16a, rps18, rps19 (×2)
rRNA genes		rRNA genes	rrn4.5S (×2), rrn5S (×2), rrn16S (×2), rrn23S (×2)
tRNA genes		tRNA genes	trnA-UGCa (×2), trnC-GCA, trnD-GUC, trnE-UUC, trnF-GAA, trnfM-CAU, trnG-UCCa, trnG-GCC, trnH-GUG, trnI-CAU (×2), trnI-GAUa (×2), trnK-UUUa, trnL-CAA (×2), trnL-UAAa, trnL-UAG, trnM-CAU, trnN-GUU (×2), trnP-UGG, trnQ-UUG, trnR-ACG (×2), trnR-UCU, trnS-GGA, trnS-UGA, trnS-GCU, trnT-GGU, trnT-UGU, trnV-GAC (×2), trnV-UACa, trnW-CCA, trnY-GUA
a Genes containing one or more introns.

## Sheet: Table S3
Table S3 The hot spot regions obtained based on the exhaustive method.
No.	Region	Gene/IGS	Length (bp)	SNP	Variant Frequency
1	LSC	trnK_rps16	1984	20	0.0100806
2	LSC	psbK_I+psbI+psbI_trnS+trnS+trnS_G	1788	14	0.00782998
3	LSC	atpA_F+atpF	1632	18	0.0110294
4	LSC	rpoC2	852	10	0.0117371
5	LSC	rpoB_trnC-GCA	1204	13	0.0107973
6	LSC	trnE-UUC_trnT-GGU+trnT+trnT_psbD	1040	11	0.0105769
7	LSC	psaA_ycf3+ycf3	1183	10	0.00845309
8	LSC	ycf3+ycf3_trnS	955	10	0.0104712
9	LSC	rps4_trnT-UGU+trnT+trnT-UGU_trnL-UAA	1677	25	0.0149076
10	LSC	trnF-GAA_ndhJ+ndhJ	899	10	0.0111235
11	LSC	psbE_petL+petL+petL_G	737	10	0.0135685
12	LSC	rpl16+rpl16_rps3	2617	26	0.00993504
13	SSC	ycf1+ndhF	2044	21	0.010274
14	SSC	ndhF+ndhF_rpl32	2818	35	0.0124202
15	SSC	ndhD+ndhD_psaC+psaC+psaC_ndhE	1573	15	0.00953592
16	SSC	ycf1	2473	27	0.0109179
